# Supplementary material for: In situ construction of S-scheme heterojunction-conjugated polymer/g-C3N4 photocatalysts for enhanced H2 production and organic pollutant degradation
Source: Royal Society of Chemistry journal article supplement (doi:10.1039/d3cy00248a), 2023-01-01
Supplement: d3cy00248a1.pdf [file d3cy00248a1.pdf]

# **In situ construction of S-scheme heterojunction conjugated polymer/g-C<sub>3</sub>N<sub>4</sub> photocatalysts for enhanced H<sub>2</sub> production and organic pollutant degradation**

Na Mao<sup>a,b</sup>

*<sup>a</sup>College of Chemistry and Materials, Weinan Normal university, Weinan 714099, P. R.*

*China E-mail: [maona166@126.com](mailto:maona166@126.com)*

*<sup>b</sup>Shaanxi Key Laboratory for Advanced Energy Devices, Key Laboratory for Macromolecular Science of Shaanxi Province, School of Materials Science and Engineering, Shaanxi Normal University, Xi'an, Shaanxi, 710062, P. R. China.*

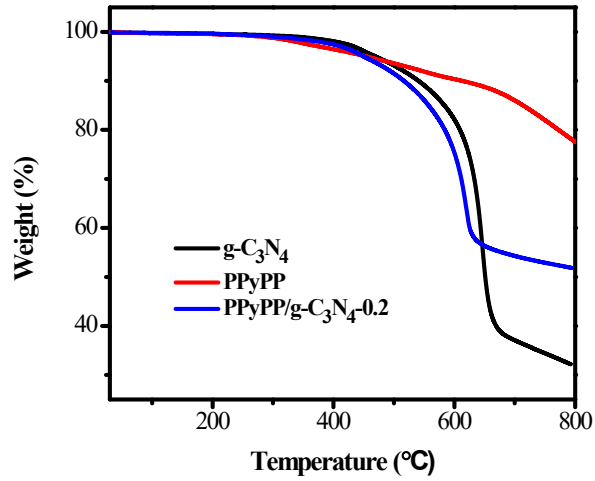

**Fig. S1.** Thermogravimetric analysis trace of  $g\text{-C}_3\text{N}_4$ , PPyPP, PPyPP/ $g\text{-C}_3\text{N}_4\text{-0.2}$  composite under a nitrogen atmosphere with a heating rate of  $10\text{ }^\circ\text{C}/\text{min}$ .

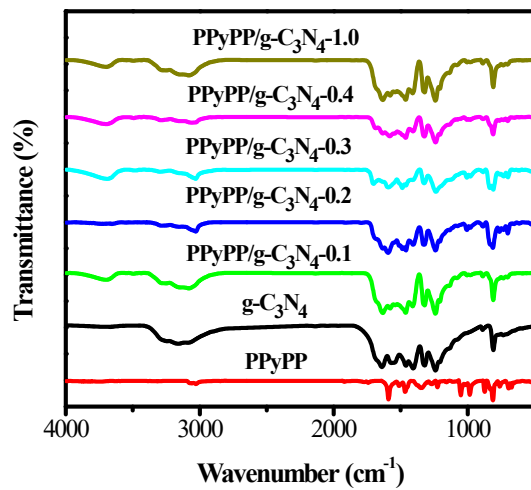

**Fig. S2.** FT-IR spectra of  $g\text{-C}_3\text{N}_4$ , PPyPP, PPyPP/ $g\text{-C}_3\text{N}_4$  composites.

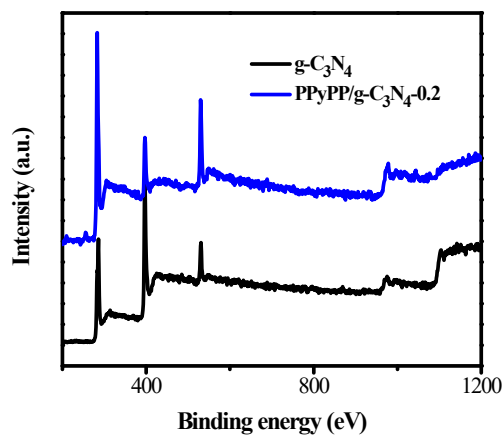

**Fig. S3.** XPS survey spectra of PPyPP/ $g\text{-C}_3\text{N}_4\text{-0.2}$  composite.

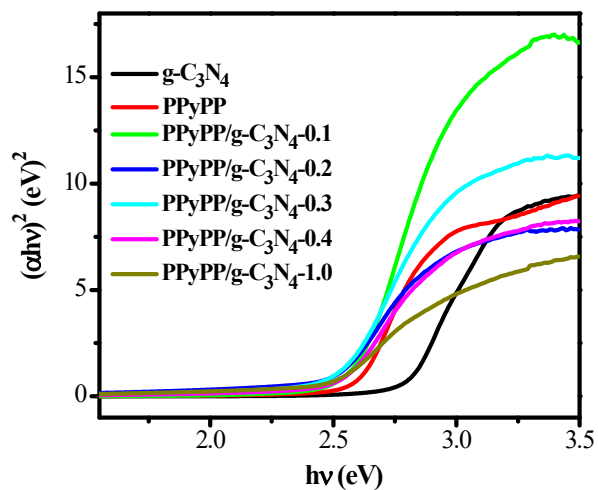

**Fig. S4.** Plots of  $(Fhv)^2$  vs photon energy ( $hv$ ) for the band gap energy for all samples.

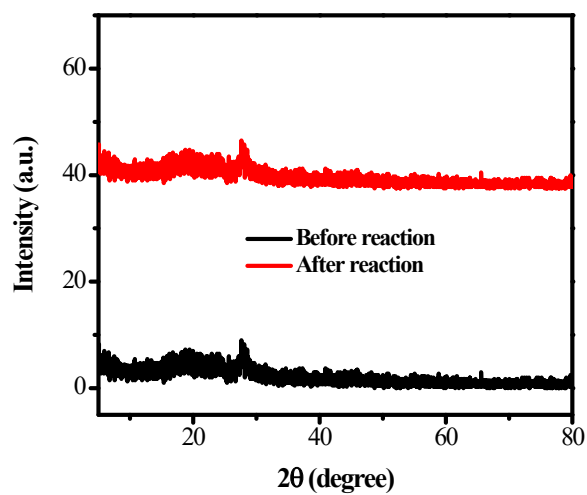

**Fig. S5.** Power XRD spectra of PPyPP/g-C<sub>3</sub>N<sub>4</sub>-0.2 composite before and under light irradiation for 15 hours in a triethylamine/water mixture.

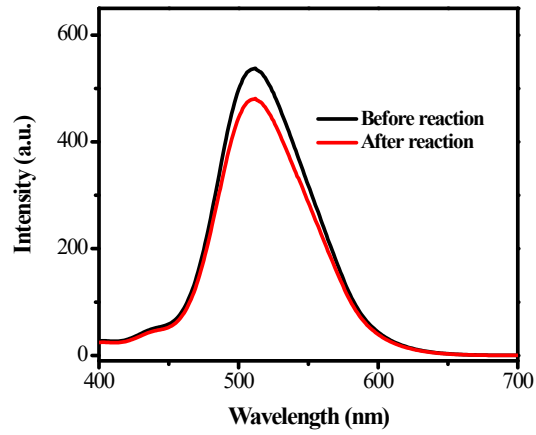

**Fig. S6.** Photoluminescence spectra ( $\lambda_{\text{ex}} = 365 \text{ nm}$ ) of PPyPP/g-C<sub>3</sub>N<sub>4</sub>-0.2 composite before and under light irradiation for 15 hours in a triethylamine/water mixture.

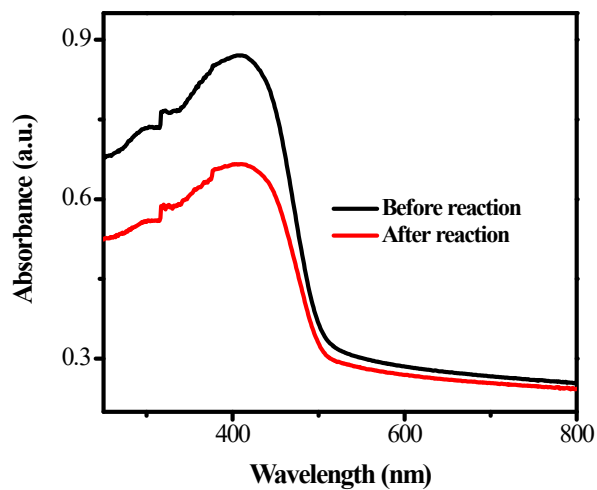

**Fig. S7.** UV-vis DRS of PPyPP/g-C<sub>3</sub>N<sub>4</sub>-0.2 composite before and under light irradiation for 15 hours in a triethylamine/water mixture;
